# Supplementary material for: Impact of Formalin- and Cryofixation on Raman Spectra of Human Tissues and Strategies for Tumor Bank Inclusion
Source: MDPI journal article supplement (doi:10.3390/molecules29051167), 2024-03-06
Supplement: s1 [file s1]

# Impact of Formalin- and Cryofixation on Raman Spectra of Human Tissues and Strategies for Tumor Bank Inclusion

Giulia Mirizzi <sup>1,2,†</sup>, Finn Jelke <sup>1,2,3,†</sup>, Michel Pilot <sup>4</sup>, Karoline Klein <sup>2</sup>, Gilbert Georg Klammeringer <sup>5,6</sup>, Jean-Jacques Gérardy <sup>6,7</sup>, Marily Theodoropoulou <sup>4</sup>, Laurent Mombaerts <sup>1,8</sup>, Andreas Husch <sup>8</sup>, Michel Mittelbronn <sup>3,6,7,8,9</sup>, Frank Hertel <sup>1,2</sup> and Felix Bruno Kleine Borgmann <sup>2,3,10,\*</sup>

- <sup>1</sup> National Department of Neurosurgery, Centre Hospitalier de Luxembourg (CHL), 1210 Luxembourg, Luxembourg
  - <sup>2</sup> Saarland University Medical Center and Faculty of Medicine, 66421 Homburg, Germany
  - <sup>3</sup> Department of Cancer Research (DoCR), Luxembourg Institute of Health (LIH), 1445 Strassen, Luxembourg
  - <sup>4</sup> Department of Medicine IV, LMU University Hospital, LMU Munich, 80539 Munich, Germany
  - <sup>5</sup> Department of General and Special Pathology, Saarland University Medical Center (UKS), Saarland University (USAAR), 66424 Homburg, Germany
  - <sup>6</sup> National Center of Pathology (NCP), Laboratoire National de Santé (LNS), 3555 Dudelange, Luxembourg
  - <sup>7</sup> Luxembourg Center of Neuropathology (LCNP), 3555 Dudelange, Luxembourg
  - <sup>8</sup> Luxembourg Centre for Systems Biomedicine (LCSB), University of Luxembourg (UL), 4365 Esch-sur-Alzette, Luxembourg
  - <sup>9</sup> Department of Life Science and Medicine (DLSM), University of Luxembourg (UL), 4365 Esch-sur-Alzette, Luxembourg
  - <sup>10</sup> Hôpitaux Robert Schuman, 2540 Luxembourg, Luxembourg
- \* Correspondence: felix.kleineborgmann@lih.lu  
 † These authors contributed equally to this work.

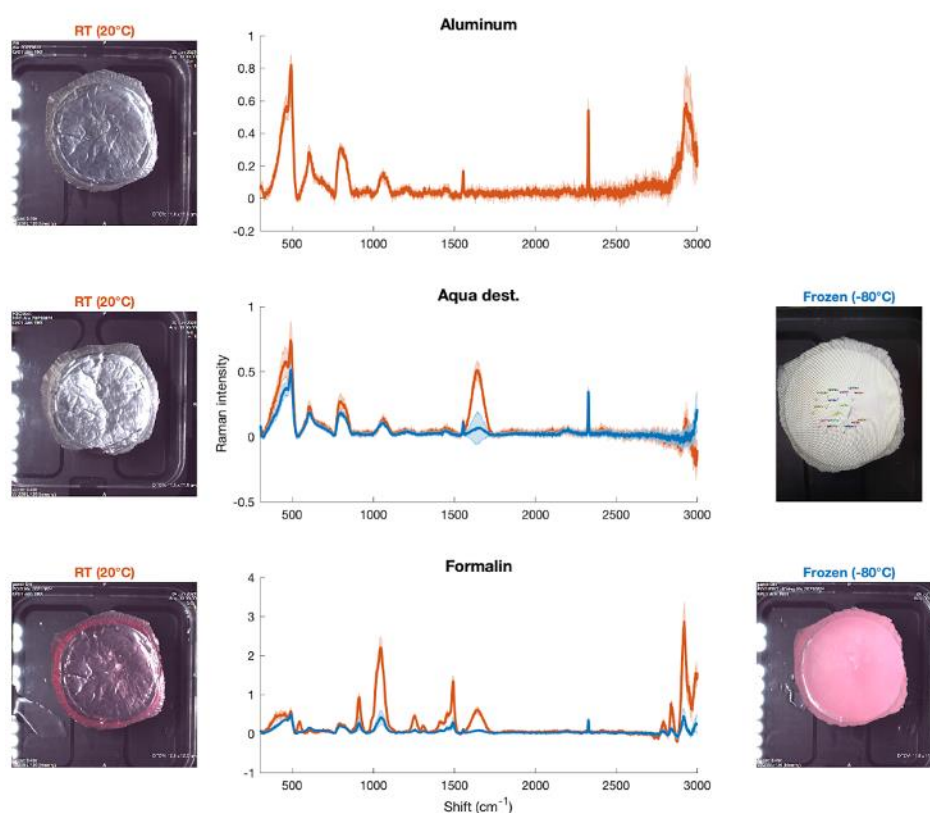

**Figure S1.** Raman spectrum of pure substances, firstly measured natively at room temperature (RT) (red spectrum), then frozen by dry ice (blue spectrum), highlighting the freezing-induced intensity reduction.
